# Supplementary material for: Monoethanolamine decay mediated by photolysis of nitrate in atmospheric particles: a brown carbon and organic phase formation pathway
Source: Royal Society of Chemistry journal article supplement (doi:10.1039/d3ea00072a), 2023-01-01
Supplement: d3ea00072a1.pdf [file d3ea00072a1.pdf]

Supporting Information for

**Monoethanolamine Decay Mediated by Photolysis of Nitrate in Atmospheric  
Particles: A Brown Carbon and Organic Phase Formation Pathway**

*Xiaomeng Tian<sup>1,2</sup>, Ruifeng Zhang<sup>1,2</sup>, Bo Wei,<sup>1,3</sup> Yalin Wang,<sup>4</sup> Yongjie Li,<sup>4</sup> and Chak K.  
Chan<sup>1,2\*</sup>*

<sup>1</sup>School of Energy and Environment, City University of Hong Kong, Tat Chee Avenue,  
Kowloon, Hong Kong, China

<sup>2</sup>City University of Hong Kong Shenzhen Research Institute, Shenzhen 518057, China;

<sup>3</sup>Environment Research Institute, Shandong University, Qingdao, 266237, PR China

<sup>4</sup>Department of Civil and Environmental Engineering, and Centre for Regional Oceans,  
Faculty of Science and Technology, University of Macau, Macau 999078, China

\*Corresponding author

Email: [chak.k.chan@cityu.edu.hk](mailto:chak.k.chan@cityu.edu.hk)

Telephone: +(852)-3442-5593.

Fax: +(852)-3442-0688

**Text S1** Ion Chromatography (IC) measurement for Product Characterization.

**Text S2** Sample pre-treatment by solid phase extraction (SPE)

**Text S3** UHPLC-MS measurement method

**Text S4** Determination of bisulfate to sulfate Raman peak area and molar ratio of  
particles in photolysis experiments

**Text S5** DFT calculation

23 **Text S6** Proposed mechanism of MEA oxidation during  $\text{NO}_3^-$  Photolysis

24 **Text S7** Proposed formation pathway for water-soluble BrC

25 **Text S8** Particulate MEA degradation mediated by  $\text{NO}_3^-$  photolysis under  
 26 atmospherically relevant conditions

27 **Fig. S1.** Schematic of the experimental setup.

28 **Fig. S2.** Time evolution of Raman spectra for the 4:0.5:1:3 (MEA:  $\text{H}_2\text{SO}_4$ :  $\text{NaNO}_3$ :  
 29  $\text{HNO}_3$ ) particles at 70% RH.

30 **Fig. S3.** Dark control experiment for MEA:  $\text{H}_2\text{SO}_4$ :  $\text{NaNO}_3$ :  $\text{HNO}_3$ =4:0.5:1:3 particles.  
 31 Error bars represent one standard deviation from triplicate experiments. (a)  $n(\text{NO}_3^-)$   
 32  $_t/n(\text{NO}_3^-)_0$  as a function of irradiation time under dark and UV irradiation at 70%RH;  
 33 (b)  $n(\text{MEA})_t/n(\text{MEA})_0$  as a function of irradiation time under dark and UV irradiation  
 34 at 70%RH; (c)  $n(\text{NO}_3^-)_t/n(\text{NO}_3^-)_0$  as a function of irradiation time under dark and UV  
 35 irradiation at 40%RH; (d)  $n(\text{MEA})_t/n(\text{MEA})_0$  as a function of irradiation time under  
 36 dark and UV irradiation at 40%RH.

37 **Fig. S4.** (a) pH as a function of photolysis time for MEA:  $\text{H}_2\text{SO}_4$ :  $\text{NaNO}_3$ :  
 38  $\text{HNO}_3$ =4:1:1:3 particles; (b) pH as a function of photolysis time for MEA:  $\text{H}_2\text{SO}_4$ :  
 39  $\text{NaNO}_3$ :  $\text{HNO}_3$ =4:0.75:1:3 particles; (c)  $A(\text{HSO}_4^-)/A(\text{SO}_4^{2-})$  as a function of calculated  
 40 pH; (d)  $n(\text{HSO}_4^-)/n(\text{SO}_4^{2-})$  as a function of calculated pH. Solution composition in (c)  
 41 and (d) are listed in Table S1. The solid lines are the polynomial fittings and results are  
 42 described in Eqn (S3-6).

43 **Fig. S5.** MEA degradation pathway.

44 **Fig. S6.** Detailed pathways for steps 1, 2-1, 2-2, and 9 in Fig. 3.

45 **Fig. S7.** Changes in particle morphologies under different experimental conditions as a

46 function of time of irradiation. The phase change of the 4:0.5:1:3 particles at 40%RH  
47 is highlighted in the dashed box.

48 **Fig. S8.** Morphology of the 4:0.5:1:3 particles at 85% RH after 24hr irradiation.

49 **Fig. S9.** The 4:0.5:1:3 particles on the substrate before the experiment (a), after 24hr  
50 irradiation (b) and continually supplying air without UV irradiation for another 12 hr  
51 (c) at 85%RH.

52 **Fig. S10.** Raman spectra for the liquid phase of the studied particle (a) and a  
53 neighboring particle(b) after 24hr UV irradiation. During the 24hr irradiation, no  
54 Raman laser exposure was given to particles. Raman spectra for the particle at 0hr  
55 before UV irradiation were plotted as the reference.

56 **Fig. S11.** (a) Freshly made solution by mixing MEA,  $\text{NH}_2\text{CHO}$ ,  $\text{CHOCHO}$ ,  
57  $\text{NH}_2\text{CH}_2\text{COOH}$ ,  $\text{Na}_2\text{SO}_4$ ,  $(\text{NH}_4)_2\text{SO}_4$  and  $\text{H}_2\text{SO}_4$ . (b) Same solution after 3 days in dark.  
58

59 **Fig. S12.** Raman spectra for the particle made by the solution in Fig. S11(b).

60 **Fig. S13.** (a) Morphology of particles made from the solution in Fig. S11(b); (b)  
61 Morphology of particles made from the solution in Fig. S11(b) after 24hr UV  
62 irradiation.  $\text{NaNO}_3$  was added to the solution before making particles.

63 **Fig. S14.** (a) Detected Raman signals in the organic phase at 24 hr irradiation of the  
64 4:0.5:1:3 particles at 85% RH for the second scan and in the organic phase from BrC  
65 photolysis. Raman peaks of the organic phase in each spectrum were highlighted in red  
66 in (b) and (c).

67 **Fig. S15.** Detected Raman signals in oxamide and in the organic phase after 24 hr  
68 irradiation of the 4:0.5:1:3 particles at 85% RH for the second scan. Raman peaks  
69 attributed to oxamide were highlighted in red.

70 **Fig. S16.** Changes in morphologies of the 4:0.5:1:3 particles at 80%RH (a) Particles  
71 before the experiment; (b) particles after one cycle of day-night (12hr UV+12hr dark);  
72 (c) particles after the one cycle of day-night and a day (12hr UV+12hr dark +12hr UV);  
73 (d) particles after the one cycle of day-night and a day + 8hr dark, arrows indicating the  
74 organic phase in particles, photo was extended by merging two photos(e) particles after  
75 3 cycle of day-night.

76 **Table S1.** Raman calibration experiments using different  $\text{NH}_4\text{Cl}$ :  $\text{H}_2\text{SO}_4$ :  $\text{Na}_2\text{SO}_4$   
77 solutions to determine  $A(\text{HSO}_4^-)/A(\text{SO}_4^{2-})$  as a function of pH for MEA oxidation  
78 experiments. Noted that the  $\text{SO}_4^{2-}$  mole fraction of the solute in MEA:  $\text{H}_2\text{SO}_4$ :  $\text{NaNO}_3$ :  
79  $\text{HNO}_3 = 4:1:1:3$  and  $4:0.75:1:3$  are 1/11 and 0.75/10.25 respectively. All calibration  
80 experiments were carried out at 70%RH.

81 **Table S2.** Compound found in MS with the m/z values and structure.

82

83 **Text S1 Ion Chromatography (IC) measurement for Product Characterization.** A  
84 Dionex ICS-1100 system was used for product characterization after photolysis.  
85 Sample particles collected on the substrate after the photolysis were dissolved with  
86 0.5mL DI water. Blank samples were made by dissolving sample particles on the  
87 substrate without irradiation. For cation analysis, the IC system was equipped with an  
88 IonPac CS12A analysis column and an IonPac CG12A guard column. Samples were  
89 eluted with 20 mM methanesulfonic acid (MSA) at  $1 \text{ mL min}^{-1}$ . The retention time at  
90  $\sim 5.7 \text{ min}$  was assigned to  $\text{NH}_4^+$  by comparing it with  $\text{NH}_4^+$  in the  $\text{NH}_4\text{Cl}$  standard  
91 solution. For anion analysis, the IC system was equipped with an IonPac AS15 analysis  
92 column and an IonPac AG15 guard column. Samples were eluted with 38mM NaOH at  
93  $1.2 \text{ mL min}^{-1}$ . The retention time at  $\sim 3.3 \text{ min}$  was assigned to formate by comparing

94 and comparing with formate in sodium formate standard solution.

95 **Text S2 Sample pre-treatment by solid phase extraction (SPE).** Before MS analysis,  
96 SPE was performed on all the samples using SPE cartridges (HLB, 60 mg, 3cc, 30  $\mu$ m,  
97 Waters) to desalt or remove bisulfate and sulfate ions that may damage the LC column.<sup>1</sup>  
98 The SPE procedure was used as follows.<sup>1,2</sup> First, the SPE cartridge was activated and  
99 conditioned by rinsing with 1 mL HPLC grade MeOH and 1 mL deionized water, then  
100 drained by an external pump after pre-washing. A volume of 1 mL of sample was added  
101 to the SPE tube. The tube was then washed with 1 mL 5% MeOH solution to remove  
102 the bisulfate and sulfate ions. Then the SPE tube was dried by flushing air through the  
103 cartridge using an air pump. Organic compounds adsorbed on the SPE column were  
104 eluted using 1mL HPLC grade acetonitrile for Orbitrap analysis.

105 **Text S3 UHPLC-MS measurement method.** Thermo Scientific Dionex Ultimate  
106 3000 UHPLC system with a Thermo Q Exactive Focus Orbitrap-Quadrupole Mass  
107 Spectrometer was used to characterize the reaction products.<sup>1</sup>

108 The separation of products was conducted using a Shim-pack GIST C18 column  
109 (3  $\mu$ m, 2.1 mm  $\times$  100 mm; Shimadzu). The column oven was held at 30  $^{\circ}$ C, and the  
110 autosampler was cooled at 10 $^{\circ}$ C. The injection volume was set to 10  $\mu$ L. The binary  
111 mobile phase consisted of A (water) and B (acetonitrile). The gradient elution was  
112 performed at a flow rate of 0.3 mL/min: 0-4 min, linear increase to 3% eluent B; 4-  
113 7min, linear increase to 50% eluent B; 7-8 min, hold 50% eluent B; 8-10 min, linear  
114 increase to 100% eluent B, and then stop at 10 min.

115 **Text S4 Determination of bisulfate to sulfate Raman peak area and molar ratio of**  
116 **particles in photolysis experiments.** Species concentrations are reflected by Raman  
117 peak areas.<sup>2</sup> In this study, we used  $\text{SO}_4^{2-}$  as the internal standard to eliminate the effect

118 of Raman laser intensity change in the measurement of Raman peak areas. In particular:

$$119 \quad \frac{[MEA]}{[SO_4^{2-}]} = \frac{S_{MEA} A(MEA)}{S_{sulfate} A(SO_4^{2-})} \quad (S1)$$

$$120 \quad \frac{[NO_3^-]}{[SO_4^{2-}]} = \frac{S_{nitrate} A(NO_3^-)}{S_{sulfate} A(SO_4^{2-})} \quad (S2)$$

121 where  $S_{MEA}$ ,  $S_{sulfate}$  and  $S_{nitrate}$  denote the slope in the correlation between concentration  
122 and peak area of MEA,  $SO_4^{2-}$  and  $NO_3^-$  respectively.

123 However, pH affects the equilibrium of  $SO_4^{2-} + H^+ = HSO_4^-$ , which changes  
124  $[SO_4^{2-}]$  during the photooxidation reactions of MEA. Besides,  $NO_3^-$  and  $HSO_4^-$  Raman  
125 peaks are overlapped at  $\sim 1050\text{cm}^{-1}$ . Hence, the determination of  $n(MEA)$  and  $n(NO_3^-)$   
126 need to incorporate the presence of bisulfate ( $HSO_4^-$ ), especially at low pH.  $n(MEA)$   
127 and  $n(NO_3^-)$  should be normalized by the total amount of  $SO_4^{2-}$  containing species  
128 ( $n(SO_4^{2-}) + n(HSO_4^-)$ ).

129 To address the influence of pH changes to the distribution of  $HSO_4^-$  and  $SO_4^{2-}$ ,  
130 we first developed empirical fits of the temporal changes of pH of the droplets from the  
131 MEA oxidation experiments (Fig. S4a and b).

$$132 \quad \text{pH (MEA: H}_2\text{SO}_4\text{: NaNO}_3\text{: HNO}_3\text{: 4:1:1:3)} = -0.0007t^3 + 0.0025t^2 + 0.1772t + 0.1586$$

133 (S3)

$$134 \quad \text{pH (MEA: H}_2\text{SO}_4\text{: NaNO}_3\text{: HNO}_3\text{: 4:0.75:1:3)} = 0.0769t + 0.905 \quad (S4)$$

135  $t$  is the photolysis time in hours in the above equations.

136 Then, we estimated  $A(HSO_4^-)/A(SO_4^{2-})$  and  $n(HSO_4^-)/n(SO_4^{2-})$  as particle pH  
137 changes using  $NO_3^-$  - free solutions at different pH values to avoid the overlapping of  
138  $NO_3^-$  and  $HSO_4^-$  peaks. It would be ideal to use MEA salts for these Raman calibration

139 experiments. However, their thermodynamic database is very limited in E-AIM. We  
 140 therefore used inorganic reagents to prepare the solutions. As listed in Table S1, NH<sub>4</sub>Cl  
 141 (99.5%, Sigma-Aldrich), H<sub>2</sub>SO<sub>4</sub> (95.0%, Acros Organics), and Na<sub>2</sub>SO<sub>4</sub> (95.0%, Acros)  
 142 were used to produce solutions of a range of pH (estimated by E-AIM). Each solution  
 143 was atomized to produce particles for Raman measurements at 70%RH. Raman peaks  
 144 at ~979 and 1050 cm<sup>-1</sup> were attributed to the  $\nu(\text{SO}_4^{2-})$  and  $\nu(\text{HSO}_4^-)$ , respectively. The  
 145 pH of particles and  $n(\text{HSO}_4^-)/n(\text{SO}_4^{2-})$  were calculated by E-AIM and listed in Table  
 146 S1.

147 We also consider the possibility that the  $\text{SO}_4^{2-}$  mole fraction of the solute  
 148 influences the distribution of  $\text{HSO}_4^-$  and  $\text{SO}_4^{2-}$  due to ionic interactions. Hence, two sets  
 149 of solutions were produced with  $\text{SO}_4^{2-}$  mole fraction of the solutes corresponding to the  
 150 initial value of the particles at MEA: H<sub>2</sub>SO<sub>4</sub>: NaNO<sub>3</sub>: HNO<sub>3</sub> = 4:1:1:3 and 4:0.75:1:3.  
 151 Although MEA and NO<sub>3</sub><sup>-</sup> were continuously depleted and new products were formed  
 152 during the photolysis experiment, we assume that the  $\text{SO}_4^{2-}$  mole fraction of the solute  
 153 was approximately constant in the first few photolysis hours. Fig. S4(c) and (d) describe  
 154 the  $A(\text{HSO}_4^-)/A(\text{SO}_4^{2-})$  and  $n(\text{HSO}_4^-)/n(\text{SO}_4^{2-})$  as a function of particle pH, respectively.  
 155 Note that the MEA: H<sub>2</sub>SO<sub>4</sub>: NaNO<sub>3</sub>: HNO<sub>3</sub>=4:1:1:3 and 4:0.75:1:3 particles show the  
 156 same trends within the measured pH range, suggesting that the trends of  $A(\text{HSO}_4^-)$   
 157  $/A(\text{SO}_4^{2-})$  and  $n(\text{HSO}_4^-)/n(\text{SO}_4^{2-})$  are independent of the  $\text{SO}_4^{2-}$  mole fraction of the  
 158 solute within the bounds of these compositions. The data from the two sets of  
 159 compositions were hence combined to obtain empirical fits (Eqn S5-6).

$$160 \quad A(\text{HSO}_4^-)/A(\text{SO}_4^{2-}) = -0.2613(\text{pH})^3 + 0.9847(\text{pH})^2 - 1.3477 \text{ pH} + 0.7169$$

161 (S5)

$$162 \quad n(\text{HSO}_4^-)/n(\text{SO}_4^{2-}) = -0.2341(\text{pH})^3 + 0.9857(\text{pH})^2 - 1.5894\text{pH} + 0.9955$$

163 (S6)

164 With  $n(\text{HSO}_4^-)/n(\text{SO}_4^{2-})$  as a function of pH of oxidation time known, we  
 165 normalized  $[\text{MEA}]$  and  $[\text{NO}_3^-]$  by the total concentration of  $\text{SO}_4^{2-}$  containing species  
 166 ( $[\text{SO}_4^{2-}]_{\text{total}} = [\text{HSO}_4^-] + [\text{SO}_4^{2-}]$ ), which is a constant irrespective of pH as described in  
 167 Eqn S7-8.

$$\frac{[\text{MEA}]}{[\text{SO}_4^{2-}]_{\text{total}}} = \frac{[\text{MEA}]}{[\text{SO}_4^{2-}](1 + \frac{[\text{HSO}_4^-]}{[\text{SO}_4^{2-}]})} = \frac{S_{\text{MEA}} A(\text{MEA})}{S_{\text{sulfate}} A(\text{SO}_4^{2-}) \left(1 + \frac{n(\text{HSO}_4^-)}{n(\text{SO}_4^{2-})}\right)}$$

168

169 (S7)

$$\frac{[\text{NO}_3^-]}{[\text{SO}_4^{2-}]_{\text{total}}} = \frac{[\text{NO}_3^-]}{[\text{SO}_4^{2-}](1 + \frac{[\text{HSO}_4^-]}{[\text{SO}_4^{2-}]})} = \frac{S_{\text{MEA}} A(\text{MEA})}{S_{\text{sulfate}} A(\text{SO}_4^{2-}) \left(1 + \frac{n(\text{HSO}_4^-)}{n(\text{SO}_4^{2-})}\right)}$$

170

171 (S8)

172 In the above equation,  $A(\text{SO}_4^{2-})$  is the measured  $\text{SO}_4^{2-}$  peak area in Raman,  
 173  $A(\text{SO}_4^{2-}) [\text{HSO}_4^-]/[\text{SO}_4^{2-}]$  is the calculated peak area when using  $\text{SO}_4^{2-}$  peak area to  
 174 reflect the concentration of  $\text{HSO}_4^-$ . Thus,  $A(\text{SO}_4^{2-}) \times (1 + [\text{HSO}_4^-]/[\text{SO}_4^{2-}])$  indicates the  
 175 peak areas of the total  $\text{SO}_4^-$  containing species ( $[\text{HSO}_4^-] + [\text{SO}_4^{2-}]$ ), if all  $\text{HSO}_4^-$  existed  
 176 as  $\text{SO}_4^{2-}$ .  $A(\text{NO}_3^-)$  is the peak attributable to  $\text{NO}_3^-$ , after subtraction of overlapping  
 177  $A(\text{HSO}_4^-)$  from the measured Raman peak at 1000-1100  $\text{cm}^{-1}$ , where the overlapping  
 178  $A(\text{HSO}_4^-)$  can be obtained from Eqn S5. The total concentration of  $\text{SO}_4^{2-}$  containing  
 179 species is described as  $[\text{SO}_4^{2-}] (1 + [\text{HSO}_4^-]/[\text{SO}_4^{2-}])$ . Noted that  $[\text{HSO}_4^-]/[\text{SO}_4^{2-}] =$   
 180  $n(\text{HSO}_4^-)/n(\text{SO}_4^{2-})$ . At the low pH, with the coexistence of  $\text{SO}_4^{2-}$  and  $\text{HSO}_4^-$ ,  $n(\text{HSO}_4^-)$   
 181  $/n(\text{SO}_4^{2-})$  at any photolysis time can be estimated by combining Eqn(S3-4 and 6).

182 Eqns S7 and S8 ultimately give  $n(\text{MEA})$  and  $n(\text{NO}_3^-)$  normalized to the  $n(\text{SO}_4^{2-})$   
 183  $_{\text{total}}$  as a function of pH. To facilitate the analysis of the decay rate of MEA and  $\text{NO}_3^-$ ,  
 184 we further normalize  $n(\text{MEA})$  and  $n(\text{NO}_3^-)$  to their respective initial value (Fig. 2 in the

185 main text and Fig. S2 in the supporting information) as below:

$$\frac{n(NO_3^-)_t}{n(SO_4^{2-})(1 + \frac{n(HSO_4^-)}{n(SO_4^{2-})})_t} / \frac{n(NO_3^-)_0}{n(SO_4^{2-})(1 + \frac{n(HSO_4^-)}{n(SO_4^{2-})})_0} = \frac{n(NO_3^-)_t}{n(NO_3^-)_0}$$

187 (S9)

$$\frac{n(MEA)_t}{n(SO_4^{2-})(1 + \frac{n(HSO_4^-)}{n(SO_4^{2-})})_t} / \frac{n(MEA)_0}{n(SO_4^{2-})(1 + \frac{n(HSO_4^-)}{n(SO_4^{2-})})_0} = \frac{n(MEA)_t}{n(MEA)_0}$$

189 (S10)

190 **Text S5 DFT calculation.** All of the electronic structure calculations were conducted  
 191 using the Gaussian 16 program<sup>3</sup> employing the M06–2X<sup>4</sup> method with the 6–31+G(d,p)  
 192 basis set. The vibrational frequencies at the same level were used to verify all stationary  
 193 points as either the transition state (TS, only one imaginary frequency) or the minima  
 194 (zero imaginary frequency). The reaction pathways were confirmed by intrinsic  
 195 reaction coordinate (IRC) analysis. The single point energies of the optimized structures  
 196 were further calculated with the 6–311++G(3df,2p) basis set. The continuum solvation  
 197 model ‘SMD’ was used to determine the solvent effect of water.<sup>5</sup>

198 **Text S6 Proposed mechanism of MEA oxidation during NO<sub>3</sub><sup>-</sup> Photolysis.** MEA  
 199 oxidation forms peroxide radical (NH<sub>2</sub>CH<sub>2</sub>CH(OO·)OH) in the presence of O<sub>2</sub>, and it  
 200 further forms NH<sub>2</sub>CH<sub>2</sub>CHO,<sup>6,7</sup> as shown in Step 1 in Fig. 3 and Fig. S6. NH<sub>2</sub>CH<sub>2</sub>CHO  
 201 was subsequently oxidized to form NH<sub>2</sub>CH<sub>2</sub>COOH (steps 2-2, 16).<sup>8,9</sup> Interestingly, the  
 202 α-H atom in NH<sub>2</sub>CH<sub>2</sub>CHO seems to be activated and further gives NH<sub>2</sub>COCHO and  
 203 CHOCHO (Steps 2-3 and after). Even though NH<sub>2</sub>CH<sub>2</sub>CHO is more likely to exist in  
 204 the protonated form as NH<sub>3</sub><sup>+</sup>CH<sub>2</sub>CHO under the experimental pH condition, the two  
 205 adjacent electron pulling groups (-NH<sub>3</sub><sup>+</sup>, -CHO) may deactivate the α-H atom.

206 However, it was reported that  $\text{Na}^+$  could form a stable bidentate ligand with  
207  $\text{NH}_2\text{CH}_2\text{COOH}$ ,<sup>10</sup> and  $\text{Na}^+$  exhibits a stronger binding affinity with amide than  
208  $\text{NH}_2\text{CH}_2\text{COOH}$ .<sup>11</sup> Sodicated and protonated  $\text{NH}_2\text{CH}_2\text{CHO}$  were both found in the  
209 UHPLC-MS analysis, as shown in Table S2. Thus, we propose a pentacyclic  
210 intermediate in the oxidation of  $\text{NH}_2\text{CH}_2\text{CHO}$ , where  $\text{Na}^+$  binds as the bidentate ligand  
211 of  $-\text{NH}_2$  and  $-\text{CHO}$  on  $\text{NH}_2\text{CH}_2\text{CHO}$  (step 2-3). Chelation of  $\text{Na}^+$  to  $-\text{NH}_2$  shielded the  
212 protonation of  $-\text{NH}_2$ , and shared the electron density with  $-\text{NH}_2$  and  $-\text{CHO}$ , thus  
213 reducing the electron pulling effect from the two adjacent groups when compared with  
214  $\text{NH}_3^+\text{CH}_2\text{CHO}$ . Besides, a steric benefit of pentacyclic structure may facilitate the OH  
215 radical attack to  $-\text{CH}_2-$ . As a result,  $\text{NH}_2\text{COCHO}$  (step 11-1) and  $\text{CHOCHO}$  (steps 11-  
216 2, 13) were formed.

217         Through the reaction steps 2-1 and 3, fragmentation reaction is initiated by H  
218 abstraction and  $\text{O}_2$  addition to the  $-\text{CHO}$  group in the presence of NO (from  $\text{NO}_3^-$   
219 photolysis) or  $\text{RO}_2$  radicals (step 2-1 in Fig. S6), and subsequent formation of the amino  
220 alkyl radical ( $\text{NH}_2\text{CH}_2\cdot$ ) and  $\text{CO}_2$ .<sup>12,13</sup>  $\text{NH}_2\text{CH}_2\cdot$  can react with  $\text{O}_2$  and OH radical via  
221 steps 4-1 and 4-2 to form amino peroxy radical ( $\text{NH}_2\text{CH}_2\text{OO}\cdot$ )<sup>14</sup> and amino methanol  
222 ( $\text{NH}_2\text{CH}_2\text{OH}$ ),<sup>15</sup> respectively.  $\text{NH}_2\text{CH}_2\text{OO}\cdot$  can further form amino alkoxy  
223 radical ( $\text{NH}_2\text{CH}_2\text{O}\cdot$ , step 5-1) or react with NO to form amino nitrooxy  
224 ( $\text{NH}_2\text{CH}_2\text{ONO}_2$ ) (step 5-2).<sup>16,17</sup> Although the photodegradation of the so-formed  
225  $\text{NH}_2\text{CH}_2\text{ONO}_2$  to  $\text{NH}_2\text{CH}_2\text{O}\cdot$  (step 6) has been proposed,<sup>16</sup> it is kinetically unfavorable  
226 with a relatively high  $\Delta G$  of 34.83 kcal/mol based on our calculation.  $\text{NH}_2\text{CHO}$  can be  
227 formed through three pathways via the oxidation of  $\text{NH}_2\text{CH}_2\text{O}\cdot$  (step 7-1),  
228  $\text{NH}_2\text{CH}_2\text{ONO}_2$  (step 7-2), and  $\text{NH}_2\text{CH}_2\text{OH}$  (step 8).<sup>13,15</sup>  $\text{NH}_2\text{CHO}$  will ultimately go  
229 through further acid-catalyzed hydrolysis to form  $\text{HCOOH}$  and  $\text{NH}_4^+$  (step 9-1, 10)<sup>18,19</sup>  
230 or be oxidized to form  $\text{CO}_2$  (step 9-2).

231 **Text S7 Proposed formation pathway for water-soluble BrC** To verify the BrC  
232 formation potential of MEA and its oxidation products, a dark experiment of the bulk  
233 solution without  $\text{NO}_3^-$  was performed to simulate the particle aging after MEA was  
234 oxidized. Based on the MEA oxidation pathway shown in Fig. 3 in the main text, we  
235 assume that half of MEA was oxidized, from which one half-formed CHOCHO and  
236  $\text{NH}_2\text{CH}_2\text{COOH}$  without C-C bond cleavage, and another half-formed  $\text{NH}_2\text{CHO}$  and  
237  $\text{NH}_4^+$  by fragmentation. We prepared a solution stoichiometrically with MEA  
238 (0.02mol), CHOCHO (0.01mol),  $\text{NH}_2\text{CH}_2\text{COOH}$  (0.01mol),  $\text{NH}_2\text{CHO}$  (0.01mol), and  
239  $\text{Na}_2\text{SO}_4$  (0.005mol),  $(\text{NH}_4)_2\text{SO}_4$  (0.01mol), then added  $\text{H}_2\text{SO}_4$  to adjust the pH to  $\sim 4$ ,  
240 which corresponds to the particle pH value measured after the photolysis (Fig. 2). It  
241 should be noted that the browning of aqueous particle phases only takes minutes to  
242 hours while that of the aqueous bulk solution takes days.<sup>20</sup> After three days in the dark,  
243 the solution turned brown, as shown in Fig. S11. Particles were made from the browned  
244 solution and scanned by Raman spectroscopy. As shown in Fig. S12, the Raman spectra  
245 for the particles also exhibited an enhanced background. Similar to the particulate MEA  
246 oxidation experiment, the background intensity decreased after each successive Raman  
247 scan within 1 minute, indicating that the BrC was photobleached by the 532nm laser.

248 **Text S8 Particulate MEA degradation mediated by  $\text{NO}_3^-$  photolysis under**  
249 **atmospherically relevant conditions.** Based on the experimental room temperature  
250 ( $22 \pm 2^\circ\text{C}$ ), we consider the typical meteorological conditions in spring and autumn in  
251 southern China, and set the simulation RH correspondingly at 80%RH.<sup>21</sup> In our  
252 previous study about the reactive uptake of MEA by  $\text{H}_2\text{SO}_4$  particles, we found that  
253 under elevated RH conditions, MEA could effectively partition into acidic particles and  
254 completely neutralize the  $\text{H}_2\text{SO}_4$  particles within 1hr.<sup>22</sup> Thus, the fully neutralized  
255 4:0.5:1:3 particles were used as the model particles to simulate the particulate MEA

256 degradation mediated by  $\text{NO}_3^-$  photolysis. Note that the photon flux received by  
257 particles was  $\sim 2 \times 10^{15}$  photons  $\text{cm}^{-2} \text{s}^{-1}$ , which is comparable with the intensity received  
258 under the sunlight ( $\sim 3.5 \times 10^{15}$  photons  $\text{cm}^{-2} \text{s}^{-1}$ ) in spring and autumn despite the  
259 irradiation wavelength difference.<sup>21</sup> However, previously, in the presence of OH radical  
260 scavenger (glyoxal), it was found that the produced OH radical concentration is  $\sim 10^{-15}$   
261 M, which falls in the range of the measured OH radical concentration ( $0.1\text{--}6 \times 10^{-15}$  M)  
262 in the reported field study.<sup>23</sup> Under the same RH and UV irradiation intensity,  $[\text{NO}_3^-]$   
263 and [MEA] were calculated as  $4.26 \text{ M}$ ,<sup>24</sup> which is coincidentally same as the  $[\text{NO}_3^-]$  and  
264 [glyoxal] used in the previous study. Although the OH radical scavenger is different,  
265 the produced OH radical concentration should be similar. Therefore, we accepted the  
266 same UV irradiation intensity used in the previous study to produce a comparable  
267 concentration of OH radical. The irradiation time was set as 12hr, which is the same as  
268 the sunshine duration in spring and autumn in southern China, which can be found in  
269 CMDC (<http://data.cma.cn/en>). We simulated 12:12 hr of day and night cycle by  
270 having 12hr UV irradiation+12hr dark to check the time of the organic phase formation  
271 in the MEA-containing particles. To avoid the influence of the photo-bleach given by  
272 the Raman laser, during the simulation, no Raman scan was applied to the studied  
273 particles.

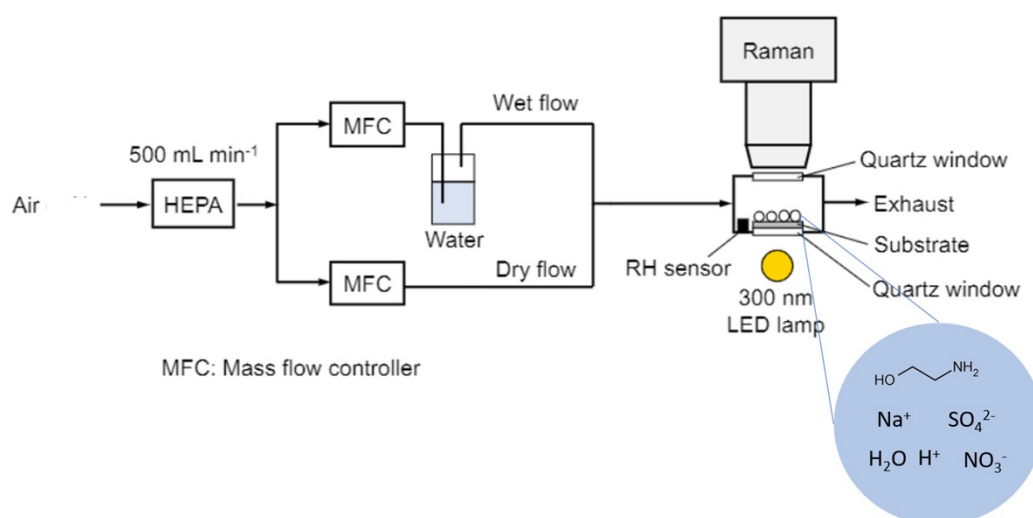

274  
275 Fig. S1 Schematic of the experimental setup.

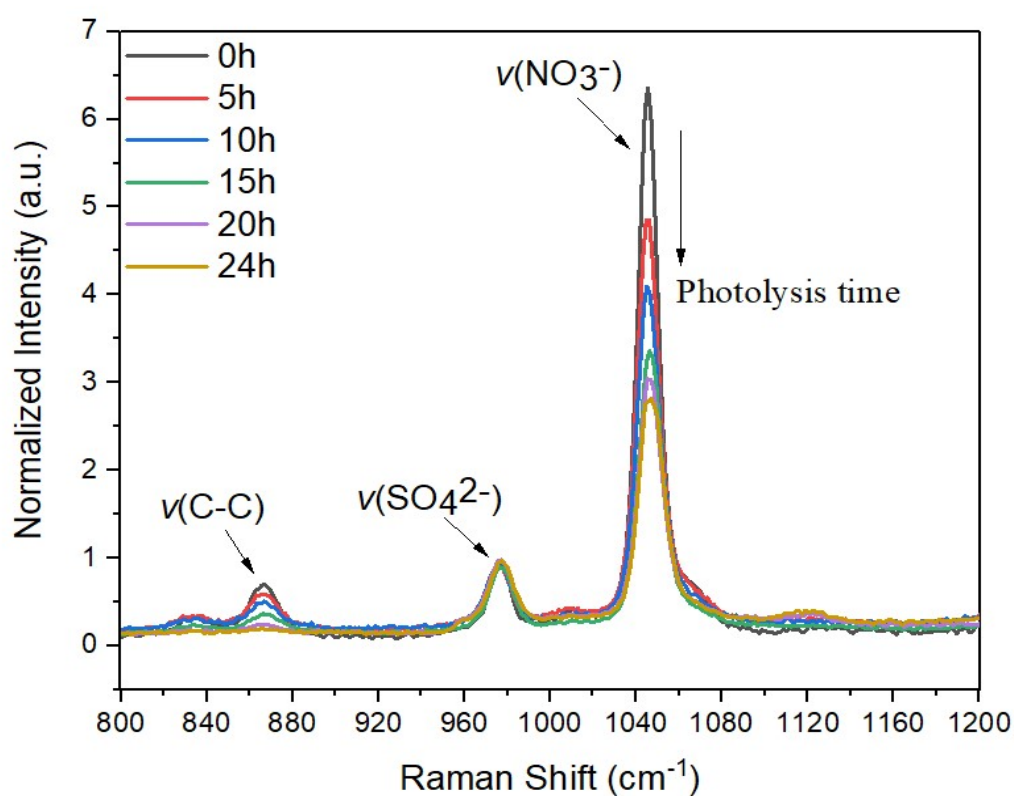

276  
277 Fig. S2 Time evolution of Raman spectra for the 4:0.5:1:3 (MEA: H<sub>2</sub>SO<sub>4</sub>: NaNO<sub>3</sub>:  
278 HNO<sub>3</sub>) particles at 70% RH.

279

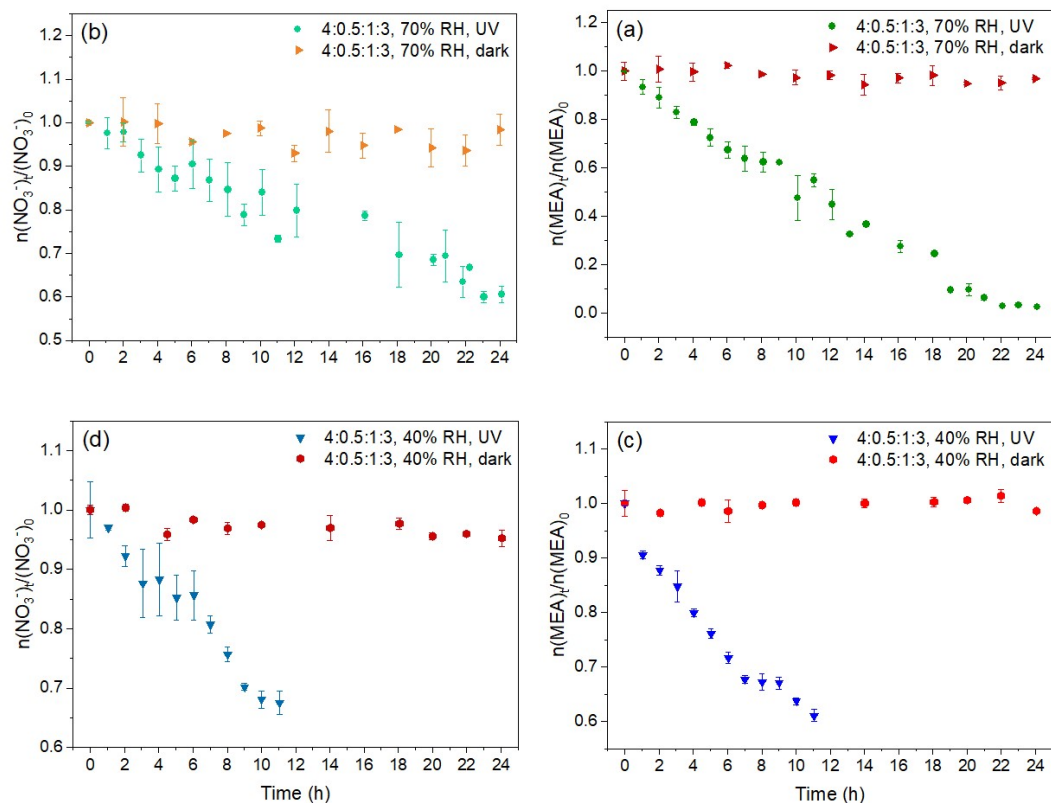

280

281 Fig. S3 Dark control experiment for MEA: H<sub>2</sub>SO<sub>4</sub>: NaNO<sub>3</sub>: HNO<sub>3</sub>=4:0.5:1:3 particles.

282 Error bars represent one standard deviation from triplicate experiments. (a)  $n(\text{NO}_3^-)_t/n(\text{NO}_3^-)_0$

283 as a function of irradiation time under dark and UV irradiation at 70%RH;

284 (b)  $n(\text{MEA})_t/n(\text{MEA})_0$  as a function of irradiation time under dark and UV irradiation

285 at 70%RH; (c)  $n(\text{NO}_3^-)_t/n(\text{NO}_3^-)_0$  as a function of irradiation time under dark and UV

286 irradiation at 40%RH; (d)  $n(\text{MEA})_t/n(\text{MEA})_0$  as a function of irradiation time under

287 dark and UV irradiation at 40%RH.

288

289

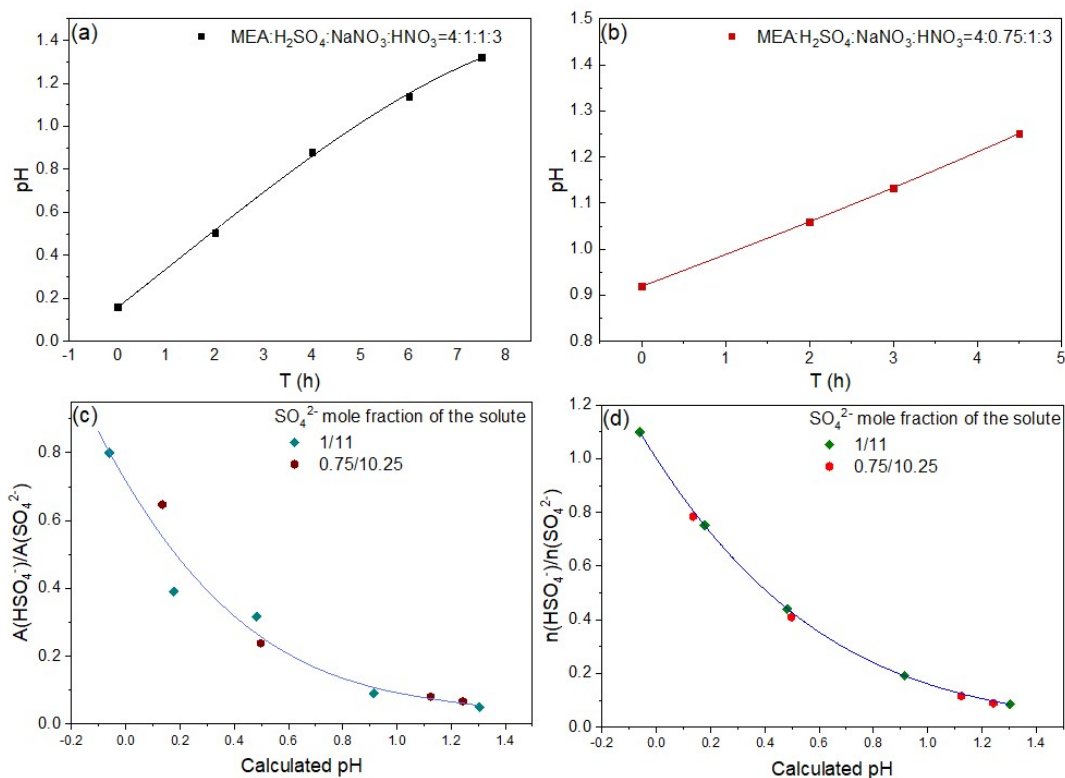

290

291 Fig. S4 (a) pH as a function of photolysis time for MEA: H<sub>2</sub>SO<sub>4</sub>: NaNO<sub>3</sub>: HNO<sub>3</sub> =  
 292 4:1:1:3 particles; (b) pH as a function of photolysis time for MEA: H<sub>2</sub>SO<sub>4</sub>: NaNO<sub>3</sub>:  
 293 HNO<sub>3</sub>=4:0.75:1:3 particles; (c)  $A(\text{HSO}_4^-)/A(\text{SO}_4^{2-})$  as a function of calculated pH; (d)  
 294  $n(\text{HSO}_4^-)/n(\text{SO}_4^{2-})$  as a function of calculated pH. Solution composition in (c) and (d)  
 295 are listed in Table S1. The solid lines are the polynomial fittings and results are  
 296 described in Eqn (S3-6).

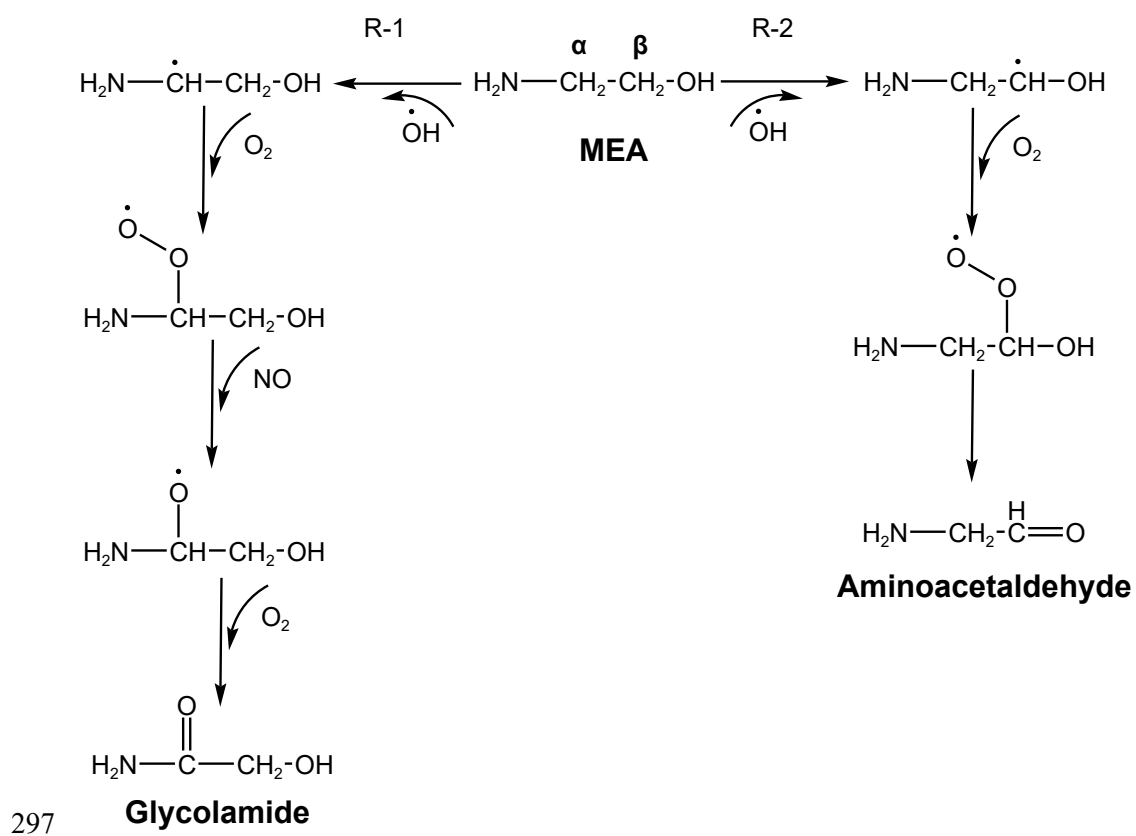

298 Fig. S5 MEA degradation pathway.

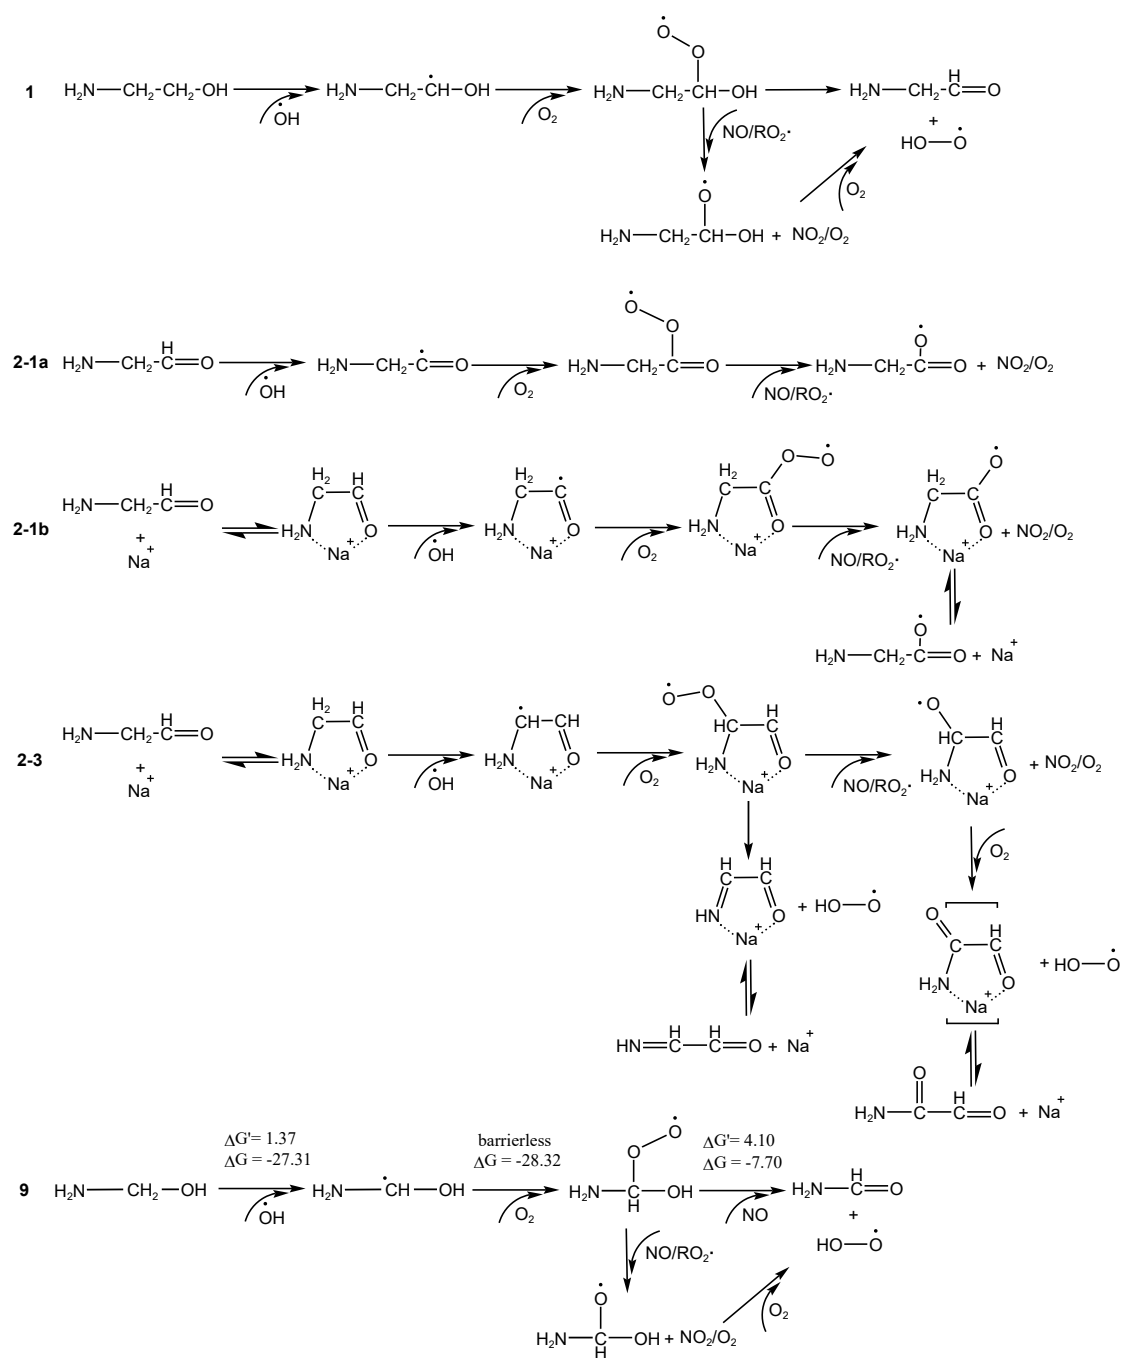

299  
300

301 Fig. S6 Detailed pathways for steps 1, 2-1, 2-2, and 9 in Fig. 3.

|                                                                                               | 0h | 5h | 10h | 15h | 20h | 24h |
|-----------------------------------------------------------------------------------------------|----|----|-----|-----|-----|-----|
| MEA:H <sub>2</sub> SO <sub>4</sub> :NaNO <sub>3</sub> :HNO <sub>3</sub><br>=4:1:1:3, 70%RH    |    |    |     |     |     |     |
| MEA:H <sub>2</sub> SO <sub>4</sub> :NaNO <sub>3</sub> :HNO <sub>3</sub><br>=4:0.75:1:3, 70%RH |    |    |     |     |     |     |
| MEA:H <sub>2</sub> SO <sub>4</sub> :NaNO <sub>3</sub> :HNO <sub>3</sub><br>=4:0.5:1:3, 70%RH  |    |    |     |     |     |     |
| MEA:H <sub>2</sub> SO <sub>4</sub> :NaNO <sub>3</sub> :HNO <sub>3</sub><br>=4:0.5:1:3, 40%RH  |    |    |     |     |     |     |
| MEA:H <sub>2</sub> SO <sub>4</sub> :NaNO <sub>3</sub> :HNO <sub>3</sub><br>=4:0.5:1:3, 55%RH  |    |    |     |     |     |     |
| MEA:H <sub>2</sub> SO <sub>4</sub> :NaNO <sub>3</sub> :HNO <sub>3</sub><br>=4:0.5:1:3, 85%RH  |    |    |     |     |     |     |

302

303 Fig. S7 Changes in particle morphologies under different experimental conditions as a  
 304 function of time of irradiation. Phase change of the 4:0.5:1:3 particles at 40%RH are  
 305 highlighted in the dashed box.

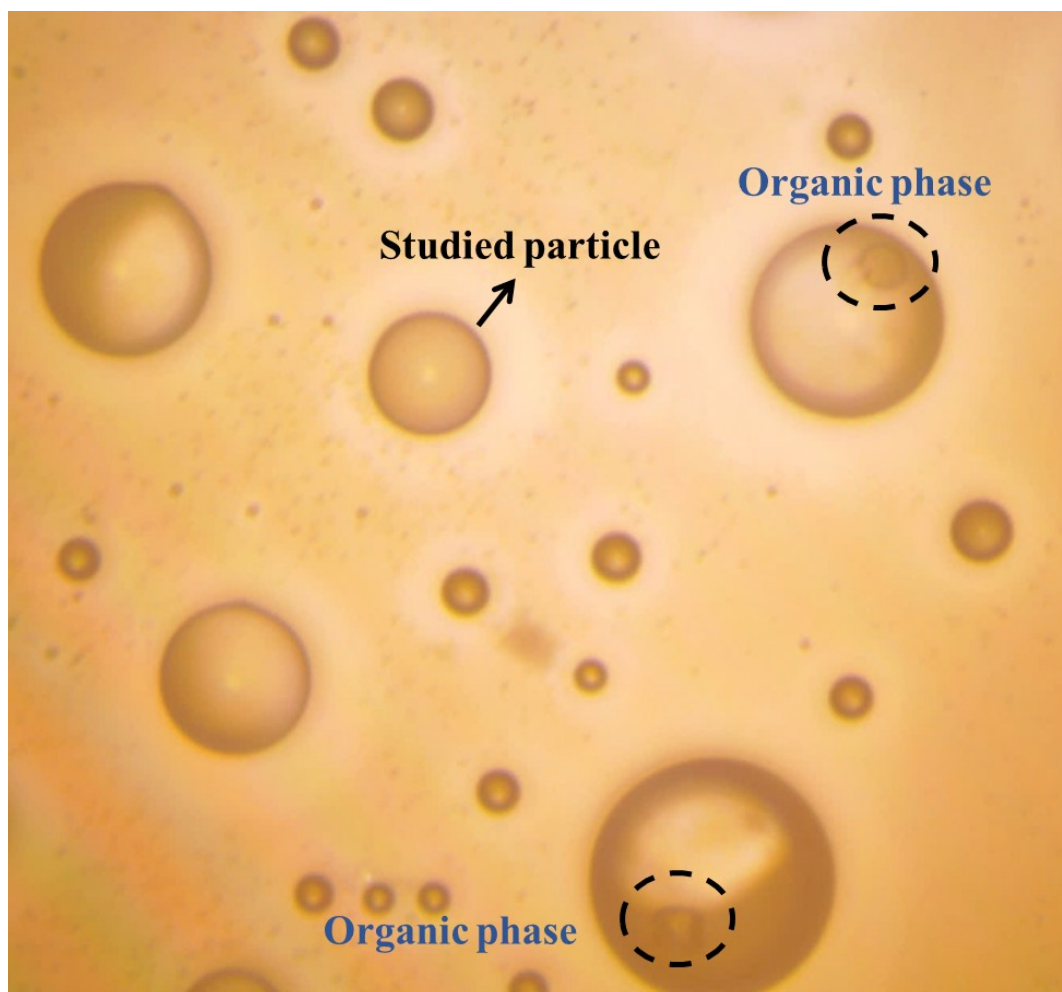

306

307 Fig. S8 Morphology of the 4:0.5:1:3 particles at 85% RH after 24hr irradiation.

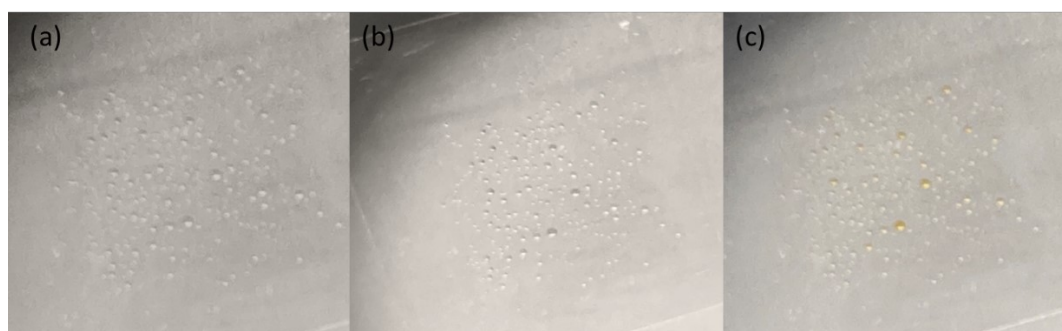

308

309 Fig. S9 The 4:0.5:1:3 particles on the substrate before the experiment (a), after 24hr  
 310 irradiation (b) and continually supplying air without UV irradiation for another 12 hr  
 311 (c) at 85%RH.

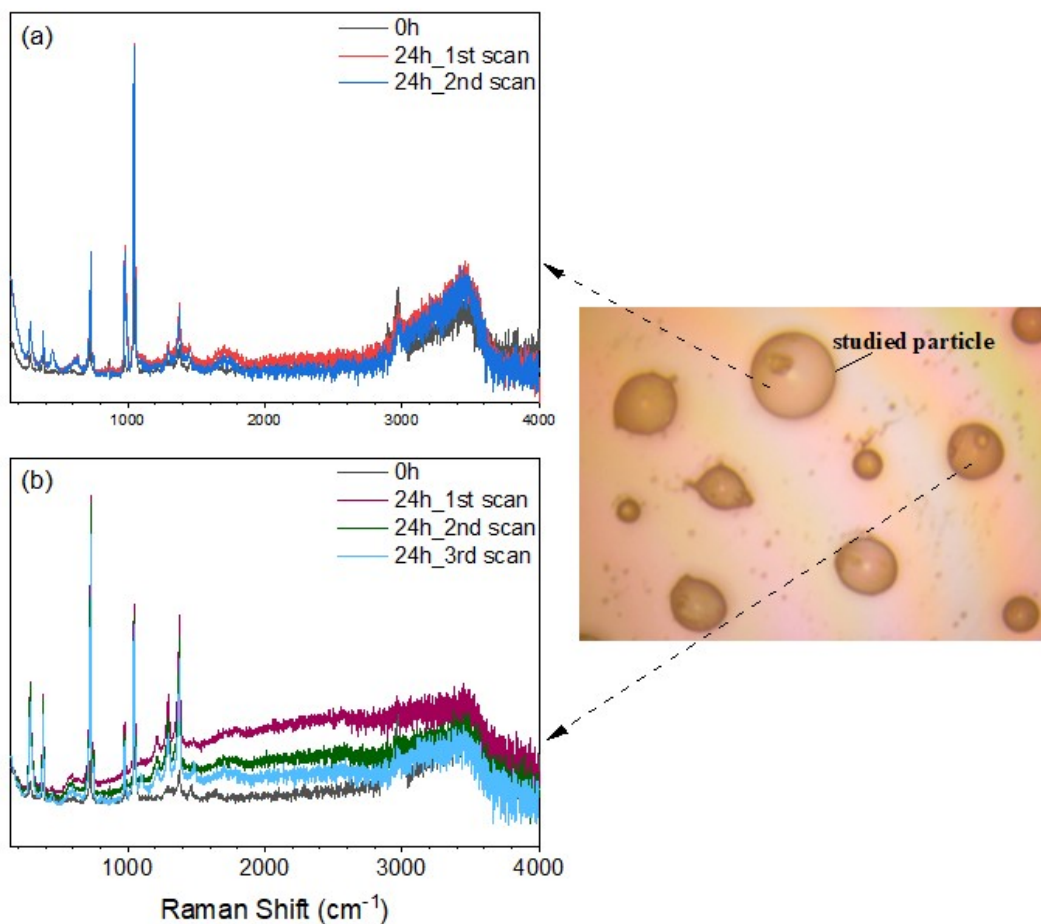

312

313 Fig. S10 Raman spectra for the liquid phase of the studied particle (a) and a neighboring  
 314 particle(b) after 24hr UV irradiation. During the 24hr irradiation, no Raman laser  
 315 exposure was given to particles. Raman spectra for the particle at 0hr before UV  
 316 irradiation were plotted as the reference.

317

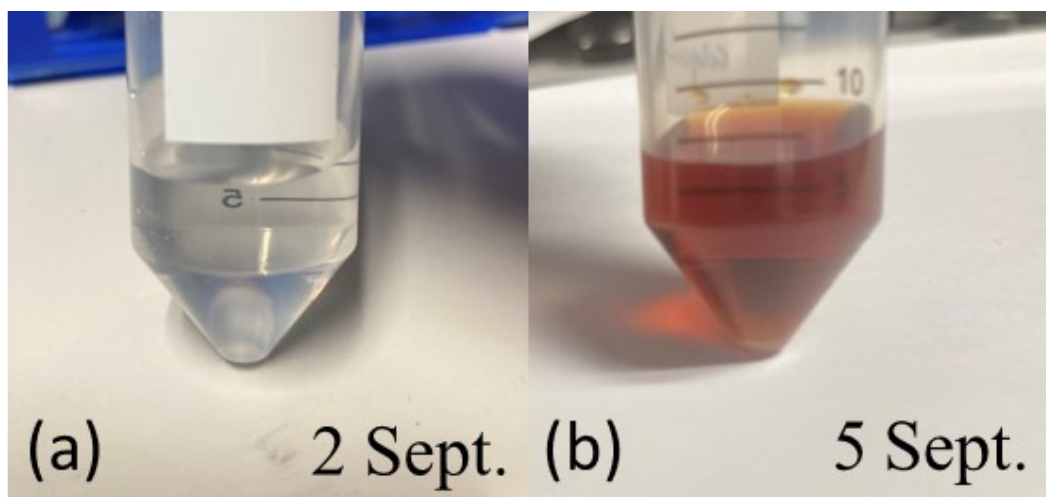

318

319 Fig. S11 (a) Freshly made solution by mixing MEA,  $\text{NH}_2\text{CHO}$ ,  $\text{CHOCHO}$ ,  
 320  $\text{NH}_2\text{CH}_2\text{COOH}$ ,  $\text{Na}_2\text{SO}_4$ ,  $(\text{NH}_4)_2\text{SO}_4$  and  $\text{H}_2\text{SO}_4$ . (b) Same solution after 3 days in the  
 321 dark.

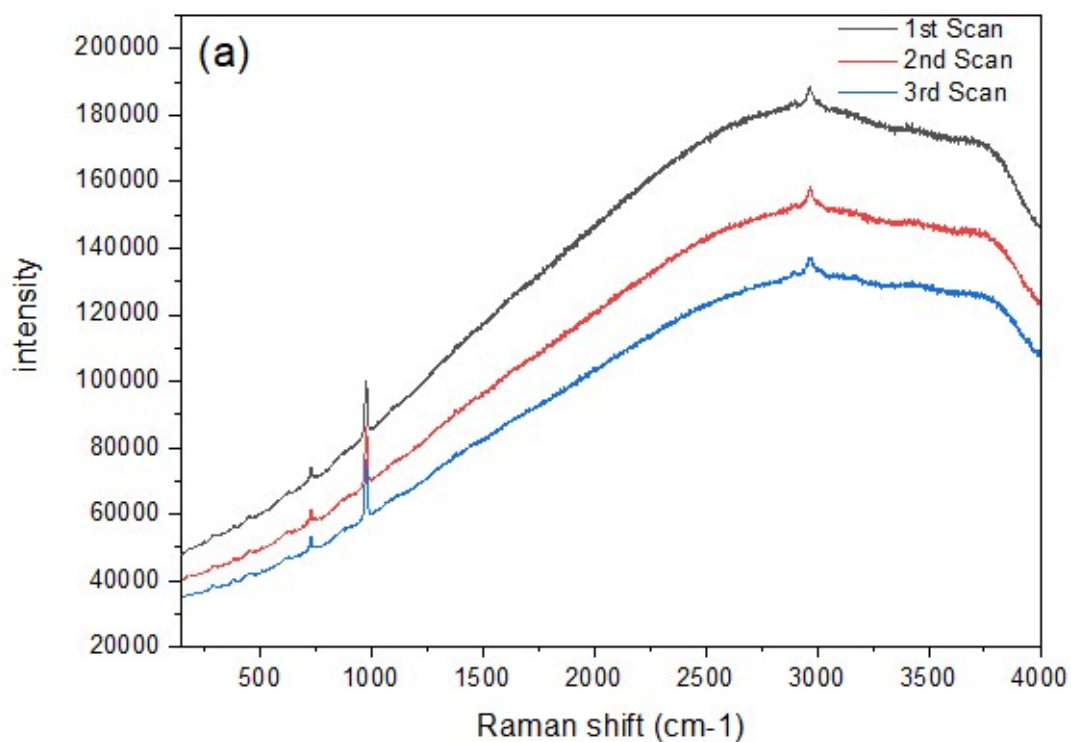

322

323 Fig. S12 Raman spectra for the particle made by the solution in Fig. S11(b).

324

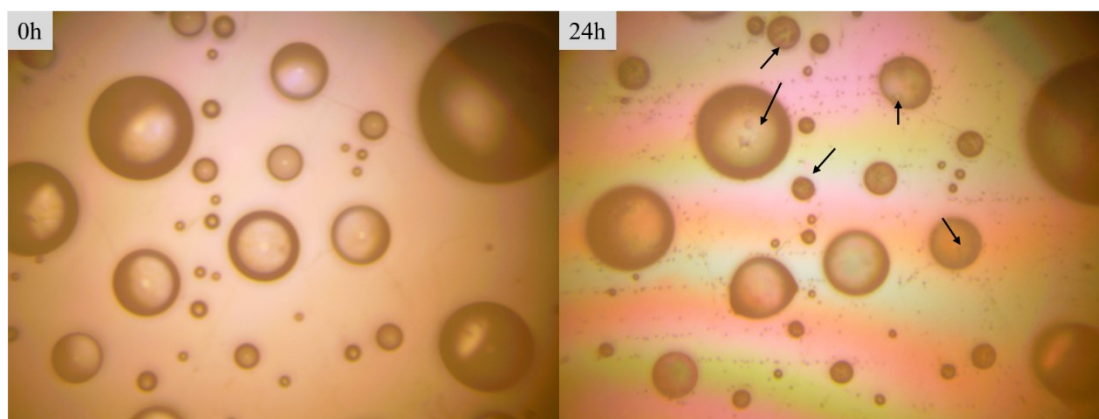

325  
 326 Fig. S13 (a) Morphology of particles made from the solution in Fig. S11(b); (b)  
 327 Morphology of particles made from the solution in Fig. S11(b) after 24hr UV  
 328 irradiation.  $\text{NaNO}_3$  was added to the solution before making particles.

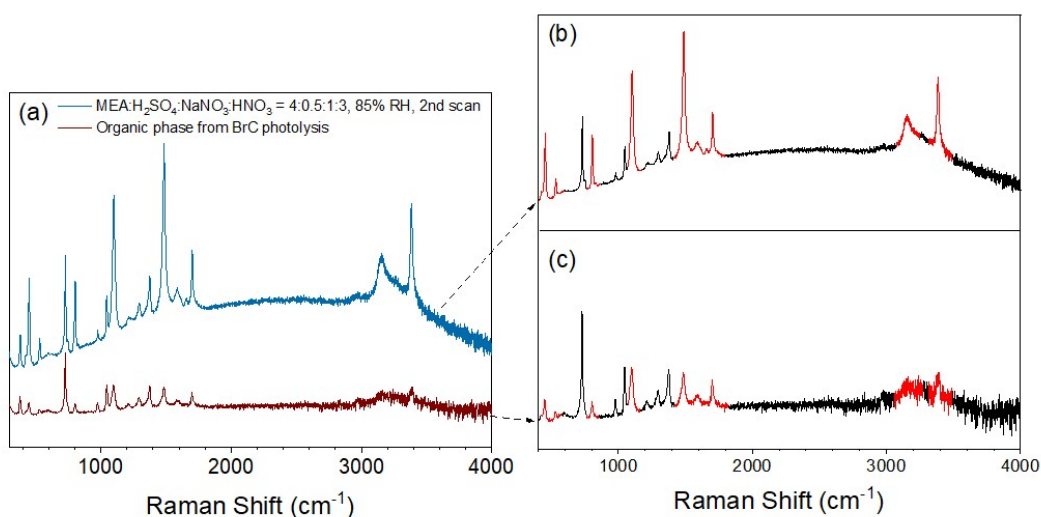

329  
 330 Fig. S14 (a) Detected Raman signals in the organic phase at 24 hr irradiation of the  
 331 4:0.5:1:3 particles at 85% RH for the second scan and in the organic phase from BrC  
 332 photolysis. Raman peaks of organic phase in each spectrum were highlighted in red in  
 333 (b) and (c).

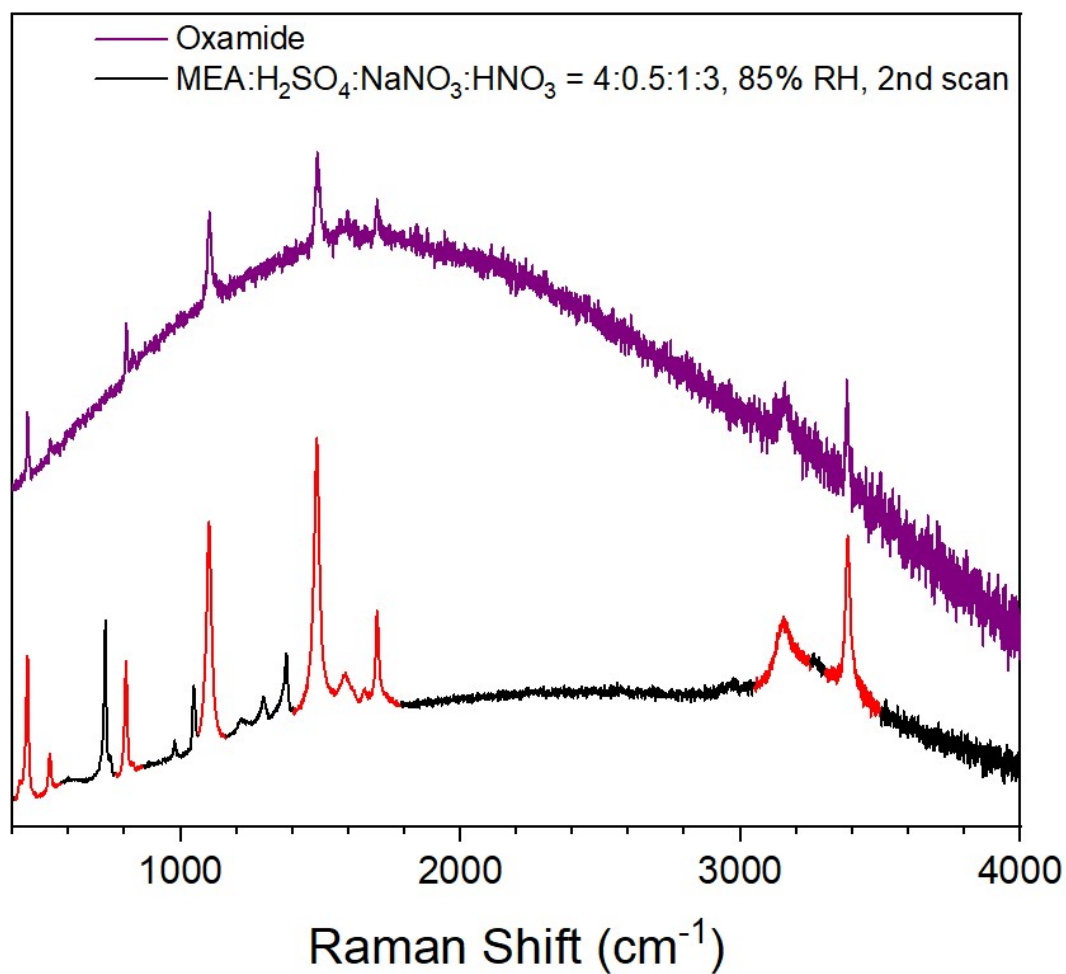

334  
335 Fig. S15 Detected Raman signals in oxamide and in the organic phase after 24 hr  
336 irradiation of the 4:0.5:1:3 particles at 85% RH for the second scan. Raman peaks  
337 attributed to oxamide were highlighted in red.

338

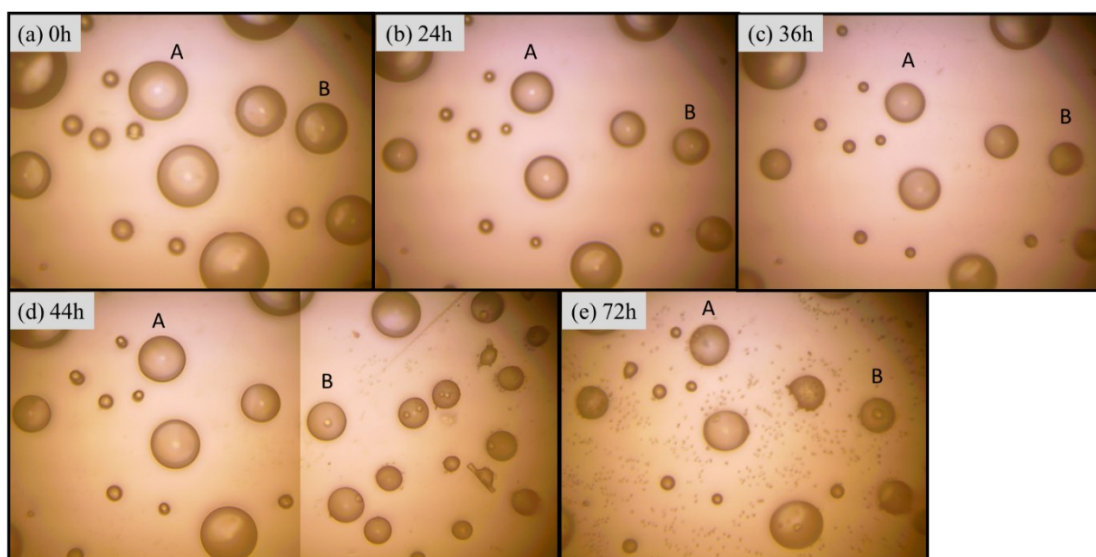

339  
 340 Fig. S16 Changes in morphologies of the 4:0.5:1:3 particles at 80%RH (a) Particles  
 341 before the experiment; (b) particles after one cycle of day-night (12hr UV+12hr dark);  
 342 (c) particles after the one cycle of day-night and a day (12hr UV+12hr dark +12hr UV);  
 343 (d) particles after the one cycle of day-night and a day + 8hr dark, photo was extended  
 344 by merging two photos; (e) particles after 3 cycle of day-night. A particle in the center  
 345 area was designated as particle A, while a particle at the periphery was designated as  
 346 particle B.

347

348

349

350

351

352

353

354

355 **Table S1. Raman calibration experiments using different  $\text{NH}_4\text{Cl}$ :  $\text{H}_2\text{SO}_4$ :  $\text{Na}_2\text{SO}_4$**

356 solutions to determine  $A(\text{HSO}_4^-)/A(\text{SO}_4^{2-})$  as a function of pH for MEA oxidation  
 357 experiments. Noted that the  $\text{SO}_4^{2-}$  mole fraction of the solute in MEA:  $\text{H}_2\text{SO}_4$ :  
 358  $\text{NaNO}_3$ :  $\text{HNO}_3 = 4:1:1:3$  and  $4:0.75:1:3$  are 1/11 and 0.75/10.25 respectively. All

| $\text{SO}_4^{2-}$ mole fraction<br>of the solute | $\text{NH}_4\text{Cl}$ : $\text{H}_2\text{SO}_4$ : $\text{Na}_2\text{SO}_4$ | $n(\text{HSO}_4^-)/n(\text{SO}_4^{2-})$ | Calculated pH |
|---------------------------------------------------|-----------------------------------------------------------------------------|-----------------------------------------|---------------|
| 1/11                                              | 4:0.4:0.6                                                                   | 1.10                                    | -0.06         |
|                                                   | 4:0.3:0.7                                                                   | 0.75                                    | 0.18          |
|                                                   | 4:0.2:0.8                                                                   | 0.44                                    | 0.48          |
|                                                   | 4:0.1:0.9                                                                   | 0.19                                    | 0.91          |
|                                                   | 4:0.05:0.95                                                                 | 0.09                                    | 1.28          |
|                                                   | 4:0.0475:0.9525                                                             | 0.04                                    | 1.30          |
| 0.75/10.25                                        | 4:0.25:0.5                                                                  | 0.78                                    | 0.14          |
|                                                   | 4:0.15:0.6                                                                  | 0.41                                    | 0.50          |
|                                                   | 4:0.05:0.7                                                                  | 0.12                                    | 1.13          |
|                                                   | 4:0.04:0.71                                                                 | 0.09                                    | 1.24          |

359 calibration experiments were carried out at 70%RH.

360

361

363 Table S2. Compound found in MS with the m/z values and structure.

| Compound                                                                     | m/z                            | Structure                                                                                                     |
|------------------------------------------------------------------------------|--------------------------------|---------------------------------------------------------------------------------------------------------------|
| Aminoacetaldehyde (C <sub>2</sub> H <sub>5</sub> NO)                         | 60.0458<br>82.0265(Sodication) | $\text{H}_2\text{N}-\text{CH}_2-\overset{\text{H}}{\text{C}}=\text{O}$                                        |
| Glyoxamide<br>(C <sub>2</sub> H <sub>3</sub> NO <sub>2</sub> )               | 74.0603                        | $\text{H}_2\text{N}-\overset{\text{O}}{\underset{\parallel}{\text{C}}}-\overset{\text{H}}{\text{C}}=\text{O}$ |
| glycine<br>(C <sub>2</sub> H <sub>5</sub> NO <sub>2</sub> )                  | 76.0318                        | $\text{H}_2\text{N}-\text{CH}_2-\overset{\text{OH}}{\underset{\parallel}{\text{C}}}=\text{O}$                 |
| Imidazole<br>(C <sub>3</sub> H <sub>4</sub> N <sub>2</sub> )                 | 69.0445                        | 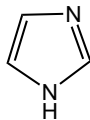                          |
| 1H-Imidazol-2-carboxamid<br>(C <sub>4</sub> H <sub>5</sub> N <sub>3</sub> O) | 112.02                         | 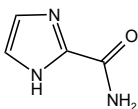                         |
| Biimidazole<br>(C <sub>6</sub> H <sub>6</sub> N <sub>4</sub> )               | 135.0627                       | 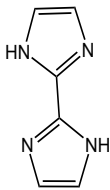                         |
| Imidazole-1-ethanol<br>(C <sub>5</sub> H <sub>8</sub> N <sub>2</sub> O)      | 113.0707                       | 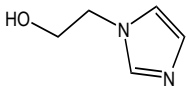                         |
| Imidazole-4-acetaldehyde<br>(C <sub>5</sub> H <sub>6</sub> N <sub>2</sub> O) | 111.0550                       | 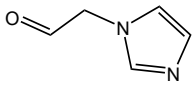                         |

366

367

368 **References:**

- 369 1 C. Lee, C. Schmidt, J. Yoon and U. von Gunten, *Environ. Sci. Technol.*, 2007, **41**,  
370 2056–2063.
- 371 2 Y. Chu, M. Sauerwein and C. K. Chan, *Physical Chemistry Chemical Physics*, 2015,  
372 **17**, 19789–19796.
- 373 3 M. J. Frisch, G. W. Trucks, H. B. Schlegel, G. E. Scuseria, M. A. Robb, J. R.  
374 Cheeseman, G. Scalmani, V. Barone, G. A. Petersson and H. Nakatsuji, *Inc.:  
375 Wallingford, CT, USA*.
- 376 4 Y. Zhao and D. G. Truhlar, *Theor Chem Account*, 2008, **120**, 215–241.
- 377 5 A. V. Marenich, C. J. Cramer and D. G. Truhlar, *The Journal of Physical Chemistry  
378 B*, 2009, **113**, 6378–6396.
- 379 6 H.-B. Xie, C. Li, N. He, C. Wang, S. Zhang and J. Chen, *Environ. Sci. Technol.*,  
380 2014, **48**, 1700–1706.
- 381 7 B. Vanderhaegen, H. Neven, H. Verachtert and G. Derdelinckx, *Food Chemistry*,  
382 2006, **95**, 357–381.
- 383 8 S. Harimurti, B. K. Dutta, I. F. B. M. Ariff, S. Chakrabarti and D. Vione, *Water Air  
384 Soil Pollut*, 2010, **211**, 273–286.
- 385 9 Y. B. Lim, Y. Tan, M. J. Perri, S. P. Seitzinger and B. J. Turpin, *Atmospheric  
386 Chemistry and Physics*, 2010, **10**, 10521–10539.
- 387 10 R. M. Moision and P. B. Armentrout, *J. Phys. Chem. A*, 2002, **106**, 10350–10362.
- 388 11 A. L. Heaton, R. M. Moision and P. B. Armentrout, *J. Phys. Chem. A*, 2008, **112**,  
389 3319–3327.
- 390 12 R. Atkinson and J. Arey, *Chem. Rev.*, 2003, **103**, 4605–4638.
- 391 13 H. J. Chacon-Madrid, A. A. Presto and N. M. Donahue, *Physical Chemistry  
392 Chemical Physics*, 2010, **12**, 13975–13982.
- 393 14 M. Karl and P. Herckes, 61.
- 394 15 M. Yasuda, T. Tomo, S. Hirata, T. Shiragami and T. Matsumoto, *Catalysts*, 2014, **4**,  
395 162–173.
- 396 16 B. Picquet-Varrault, R. Suarez-Bertoa, M. Duncianu, M. Cazaunau, E. Pangui, M.  
397 David and J.-F. Doussin, *Atmospheric Chemistry and Physics*, 2020, **20**, 487–498.
- 398 17 R. Atkinson and J. Arey, *Chem. Rev.*, 2003, **103**, 4605–4638.
- 399 18 J. F. Marlier, E. Campbell, C. Lai, M. Weber, L. A. Reinhardt and W. W. Cleland,  
400 *J. Org. Chem.*, 2006, **71**, 3829–3836.
- 401 19 B. Wang and Z. Cao, *J. Phys. Chem. A*, 2010, **114**, 12918–12927.
- 402 20 D. O. De Haan, L. N. Hawkins, H. G. Welsh, R. Pednekar, J. R. Casar, E. A.  
403 Pennington, A. de Loera, N. G. Jimenez, M. A. Symons, M. Zauscher, A. Pajunoja,

- 404 L. Caponi, M. Cazaunau, P. Formenti, A. Gratien, E. Pangui and J.-F. Doussin,  
405 *Environ. Sci. Technol.*, 2017, **51**, 7458–7466.
- 406 21 J.-L. Chen, L. He, H. Yang, M. Ma, Q. Chen, S.-J. Wu and Z. Xiao, *Renewable*  
407 *and Sustainable Energy Reviews*, 2019, **108**, 91–111.
- 408 22 X. Tian, Y. Chu and C. K. Chan, *Environ. Sci. Technol. Lett.*, 2022, **9**, 16–21.
- 409 23 R. Zhang, M. Gen, T.-M. Fu and C. K. Chan, *Environ. Sci. Technol.*, 2021, **55**,  
410 5711–5720.
- 411 24 U. von Gunten, *Water Research*, 2003, **37**, 1443–1467.
- 412
